# Supplementary material for: Red-emission enhancement of the CaAlSiN3:Eu2+ phosphor by partial substitution for Ca3N2 by CaCO3 and excess calcium source addition
Source: Royal Society of Chemistry journal article supplement (doi:10.1039/c5ra14320a), 2015-01-01
Supplement: c5ra14320a1.pdf [file c5ra14320a1.pdf]

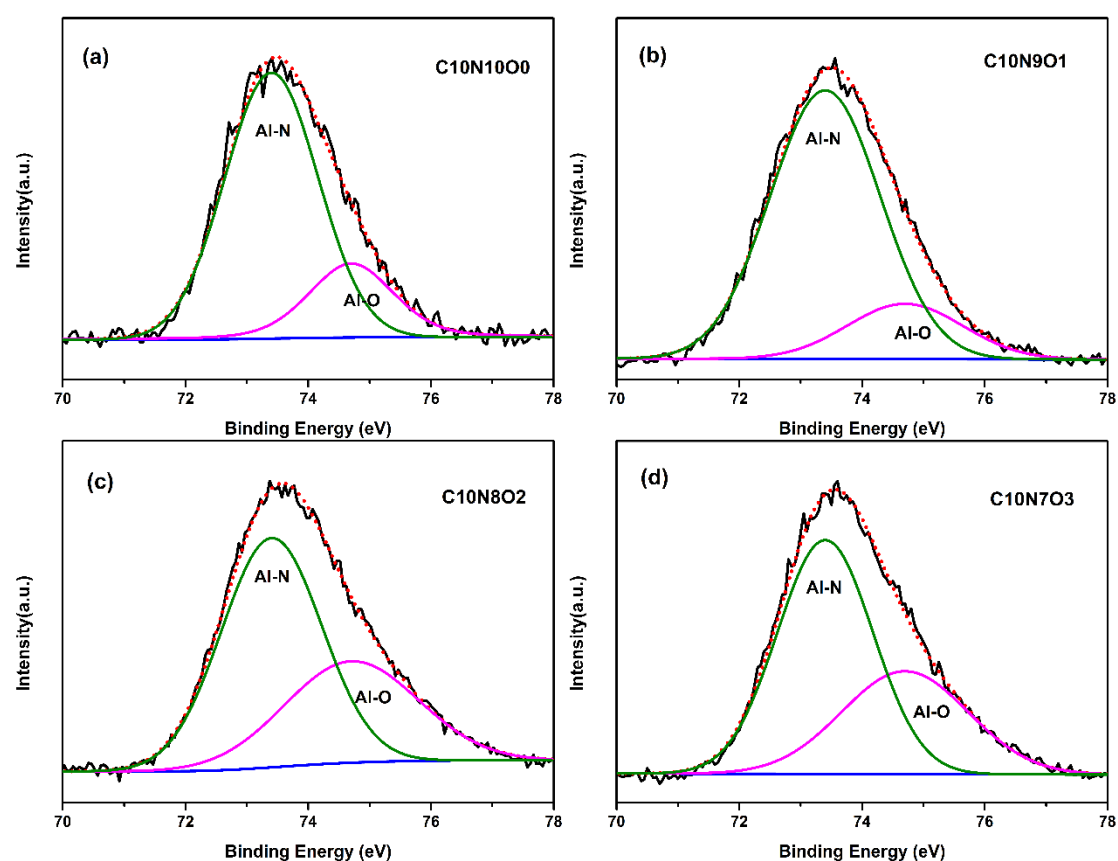

Fig. S1 XPS spectra of Al 2p for samples C10N10O0 (a), C10N9O1 (b), C10N8O2 (c), and C10N7O3 (d) after 10s Ar gas purge, with the experimental spectra depicted with dots and the simulated one with solid lines. All spectra were calibrated with C 1s peak.

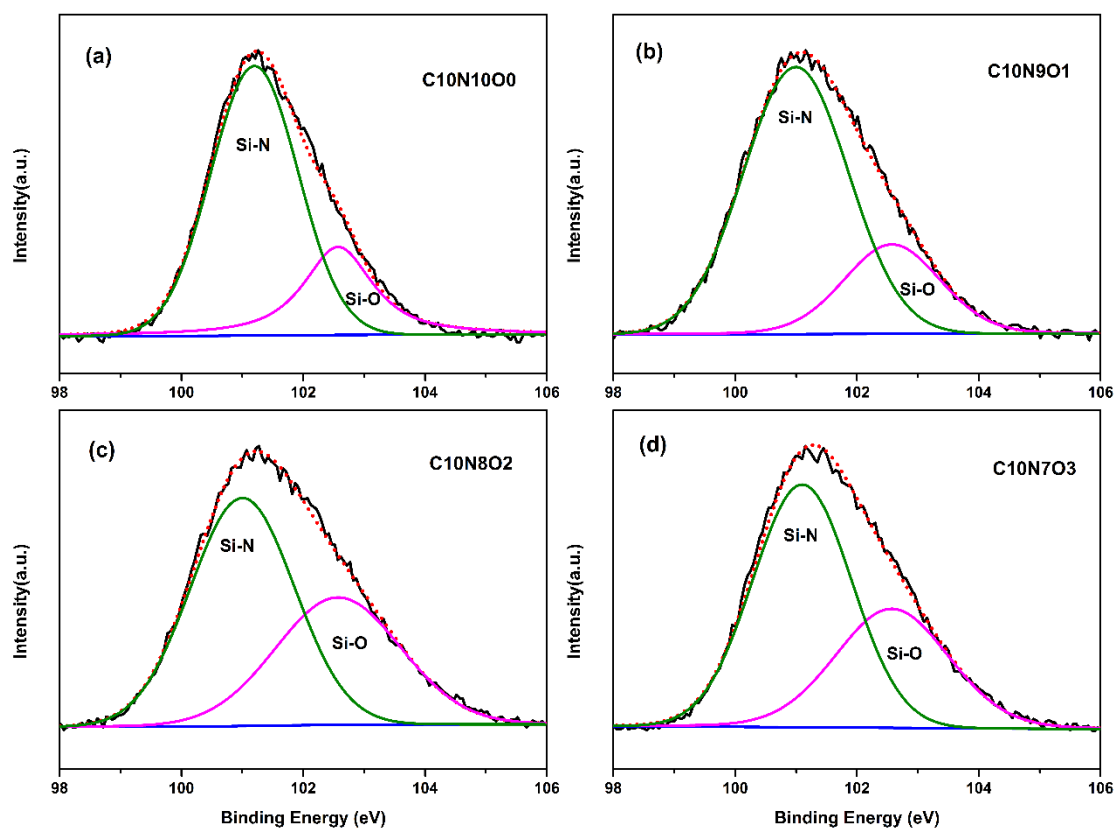

Fig. S2 XPS spectra of Si 2p for samples C10N10O0 (a), C10N9O1 (b), C10N8O2 (c), and C10N7O3 (d) after 10s Ar gas purge, with the experimental spectra depicted with dots and the simulated one with solid lines. All spectra were calibrated with C 1s peak.
